# Supplementary material for: Ketamine for Rapid Reduction of Suicidal Thoughts in Major Depression: A Midazolam-Controlled Randomized Clinical Trial
Source: Atypon-hosted journal article supplement (doi:10.1176/appi.ajp.2017.17060647), 2017-12-05
Supplement: appi.ajp.2017.17060647.ds001.pdf [file appi.ajp.2017.17060647.ds001.pdf]

Data Supplement for Grunebaum et al., Ketamine for Rapid Reduction of Suicidal Thoughts in Major Depression: A Midazolam-Controlled Randomized Clinical Trial. Am J Psychiatry (doi: 10.1176/appi.ajp.2017.17060647)

## **CONTENTS**

Figure S1. CONSORT Flow Chart

Figure S2. Dissociative Effects in Suicidal Patients with Major Depression Randomized to a Subanesthetic Infusion of Ketamine or Midazolam

Table S1. Medication Classes at Baseline for Both Treatment Groups Combined (N=80)

Table S2. Suicidal Ideation Severity During the Study for Both Treatment Groups Combined

Table S3. Depression Severity During the Study for Both Treatment Groups Combined

Table S4. Infusion-Related Cardiorespiratory Effects in Patients With Major Depressive Disorder and Clinically Significant Suicidal Ideation Given a Single Infusion of Ketamine or Midazolam

Table S5. Systematic Assessment for Treatment Emergent Events General Inquiry (SAFTEE) Ratings in a Study of Ketamine vs. Midazolam in Patients With Major Depression and Clinically Significant Suicidal Ideation

Table S6. Serious Adverse Events Requiring Institutional Review Board Report

**FIGURE S1. CONSORT Flow Chart**

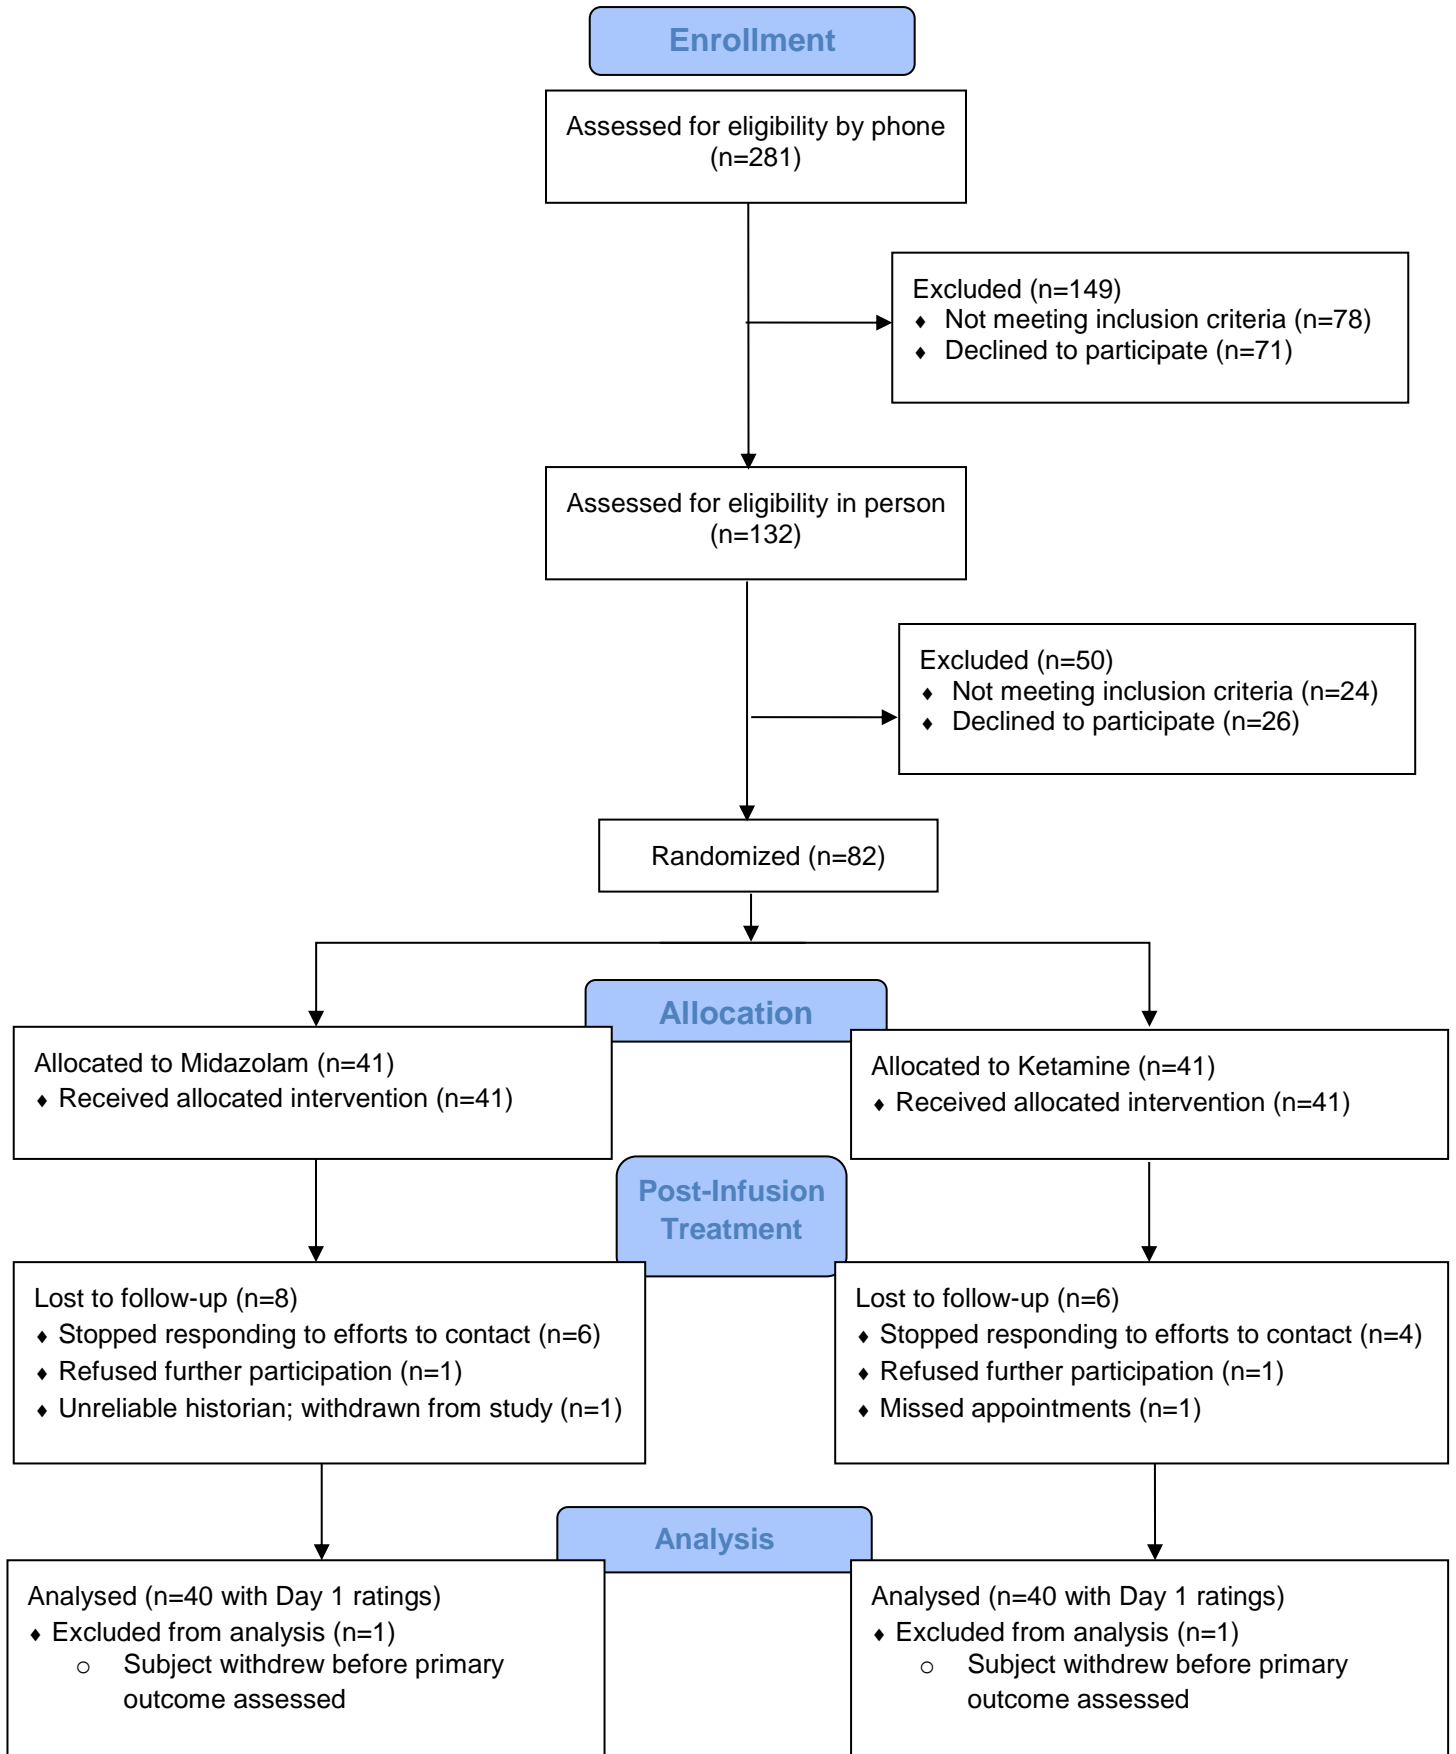

**FIGURE S2. Dissociative Effects in Suicidal Patients With Major Depression Randomized to a Subanesthetic Infusion of Ketamine or Midazolam<sup>a</sup>**

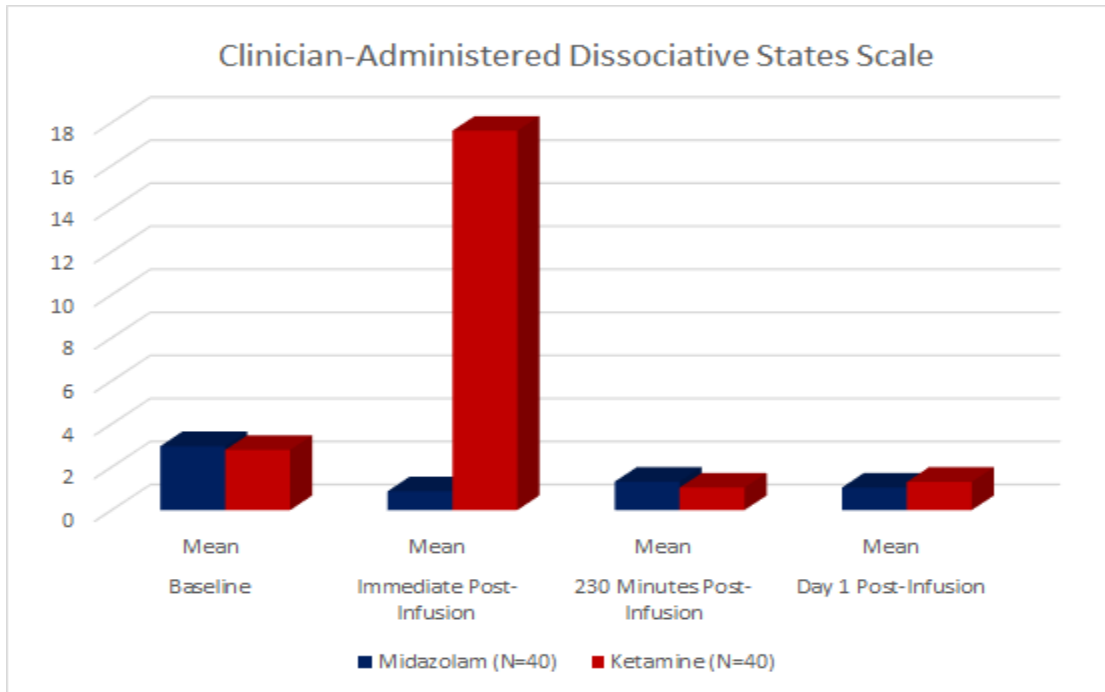

<sup>a</sup> Immediate postinfusion rating done by physician supervising infusion; 230-minute postinfusion rating done by clinical rater who was not present during infusion.

**TABLE S1. Medication Classes at Baseline for Both Treatment Groups Combined (N=80)**

| Medication            | N  | %     |
|-----------------------|----|-------|
| <b>Antidepressant</b> | 43 | 53.75 |
| SSRI                  | 14 | 17.5  |
| SNRI                  | 15 | 18.75 |
| Tricyclic             | 6  | 7.5   |
| MAOI                  | 1  | 1.25  |
| Other <sup>a</sup>    | 25 | 31.25 |
| <b>Anticonvulsant</b> | 21 | 26.25 |
| <b>Antipsychotic</b>  | 14 | 17.5  |
| <b>Benzodiazepine</b> | 27 | 33.75 |
| <b>Lithium</b>        | 2  | 2.5   |

<sup>a</sup> Other antidepressants: bupropion, trazodone, mirtazapine, vortioxetine, vilazodone.

**TABLE S2. Suicidal Ideation Severity During the Study for Both Treatment Groups Combined**

| Time Point                            | Scale for Suicidal Ideation |       |      | Change from Baseline |      | Test of Change |      |         |                      |      |        |   |
|---------------------------------------|-----------------------------|-------|------|----------------------|------|----------------|------|---------|----------------------|------|--------|---|
|                                       |                             |       |      |                      |      | From Baseline  |      |         | From Last Time Point |      |        |   |
|                                       | N                           | Mean  | SD   | Mean                 | SD   | DF             | t    | p       | DF                   | t    | p      |   |
| Baseline <sup>a</sup>                 | 80                          | 14.98 | 6.64 | .                    | .    | .              | .    | .       | .                    | .    | .      | . |
| 230 minutes after randomized infusion | 80                          | 7.43  | 6.70 | 7.55                 | 7.10 | 465            | 9.57 | <0.0001 | .                    | .    | .      | . |
| Day 1 after randomized infusion       | 80                          | 8.84  | 7.07 | 6.14                 | 7.18 | 465            | 7.78 | <0.0001 | 465                  | 2.03 | 0.0427 |   |
| Week1                                 | 73                          | 6.88  | 7.40 | 7.95                 | 8.49 | 465            | 9.60 | <0.0001 | 465                  | 2.26 | 0.0243 |   |
| Week2                                 | 70                          | 6.60  | 7.01 | 8.11                 | 8.61 | 465            | 9.69 | <0.0001 | 465                  | 0.22 | 0.8252 |   |
| Week3                                 | 67                          | 6.75  | 7.94 | 8.15                 | 9.25 | 465            | 9.27 | <0.0001 | 465                  | 0.35 | 0.7272 |   |
| Week4                                 | 60                          | 7.40  | 7.75 | 7.93                 | 9.34 | 465            | 8.71 | <0.0001 | 465                  | 0.32 | 0.7467 |   |
| Week5                                 | 61                          | 6.89  | 7.47 | 7.75                 | 9.02 | 465            | 9.15 | <0.0001 | 465                  | 0.42 | 0.6727 |   |
| Week6                                 | 61                          | 6.72  | 7.63 | 8.52                 | 8.60 | 465            | 9.61 | <0.0001 | 465                  | 0.49 | 0.6255 |   |

<sup>a</sup> Baseline is within 24 hours before infusion.

**TABLE S3. Depression Severity During the Study for Both Treatment Groups Combined**

| Time Point                      | 17-Item Hamilton Depression Rating Scale |       |      | Change from Baseline |      | Test of Change |       |         |                      |      |        |   |
|---------------------------------|------------------------------------------|-------|------|----------------------|------|----------------|-------|---------|----------------------|------|--------|---|
|                                 |                                          |       |      |                      |      | From Baseline  |       |         | From Last Time Point |      |        |   |
|                                 | N                                        | Mean  | SD   | Mean                 | SD   | DF             | t     | p       | DF                   | t    | p      |   |
| Baseline <sup>a</sup>           | 80                                       | 22.43 | 4.31 | .                    | .    | .              | .     | .       | .                    | .    | .      | . |
| Day 1 after randomized infusion | 80                                       | 16.76 | 7.23 | 5.66                 | 6.86 | 382            | 7.47  | <0.0001 | .                    | .    | .      | . |
| Week1                           | 72                                       | 15.51 | 6.98 | 6.93                 | 7.03 | 382            | 8.35  | <0.0001 | 382                  | 1.17 | 0.2428 |   |
| Week2                           | 70                                       | 14.63 | 6.80 | 7.86                 | 6.94 | 382            | 9.46  | <0.0001 | 382                  | 1.20 | 0.2320 |   |
| Week3                           | 66                                       | 14.30 | 6.64 | 7.92                 | 6.79 | 382            | 9.42  | <0.0001 | 382                  | 0.14 | 0.8873 |   |
| Week4                           | 60                                       | 14.00 | 6.76 | 8.25                 | 7.52 | 382            | 9.64  | <0.0001 | 382                  | 0.49 | 0.6277 |   |
| Week5                           | 61                                       | 13.74 | 7.63 | 8.64                 | 7.81 | 382            | 10.09 | <0.0001 | 382                  | 0.38 | 0.7008 |   |
| Week6                           | 59                                       | 13.97 | 7.43 | 8.58                 | 7.37 | 382            | 9.94  | <0.0001 | 382                  | 0.05 | 0.9597 |   |

<sup>a</sup> Baseline is within 24 hours before infusion.

**TABLE S4. Infusion-Related Cardiorespiratory Effects in Patients With Major Depressive Disorder and Clinically Significant Suicidal Ideation Given a Single Infusion of Ketamine or Midazolam<sup>a</sup>**

| Variable                                                  | Midazolam N=40<br>Mean (SD) | Ketamine N=40<br>Mean (SD) | Open Ketamine N=34<br>Mean (SD) |
|-----------------------------------------------------------|-----------------------------|----------------------------|---------------------------------|
| <b>Baseline systolic blood pressure (SBP)<sup>b</sup></b> | 120 (9.8)                   | 120 (10.6)                 | 120 (21.5)                      |
| <b>Baseline diastolic blood pressure (DBP)</b>            | 74 (7.0)                    | 74 (9.1)                   | 75 (7.2)                        |
| <b>Peak SBP</b>                                           | 124 (11.9)                  | 135 (13.7)                 | 140 (16.1)                      |
| <b>Peak DBP</b>                                           | 78 (7.5)                    | 88 (9.9)                   | 92 (10.1)                       |
| <b>Minutes to return to baseline BP<sup>c</sup></b>       | 0 (0)                       | 5.3 (9.0)                  | 5.7 (7.7)                       |
| <b>Baseline oxygen saturation</b>                         | 98 (1.5)                    | 98 (0.96)                  | 98 (1.2)                        |
| <b>Lowest oxygen saturation<sup>d</sup></b>               | 96 (2.3)                    | 97 (1.8)                   | 97 (1.5)                        |
| <b>Baseline respiratory rate</b>                          | 15 (3.3)                    | 16 (4.0)                   | 15 (3.9)                        |
| <b>Lowest respiratory rate<sup>d</sup></b>                | 12 (2.9)                    | 11 (1.8)                   | 11 (2.3)                        |

<sup>a</sup> Vital signs were measured every five minutes during treatment with ketamine 0.5 mg/kg or midazolam 0.02 mg/kg in 100 ml normal saline infused over 40 minutes, adjunctive to current, nonbenzodiazepine medications.

<sup>b</sup> Blood pressure in millimeters mercury (mm Hg).

<sup>c</sup> Return to baseline blood pressure was operationalized as DBP within 10mm Hg of baseline or DBP<85.

<sup>d</sup> Midazolam was associated with a Mean=1.60 (SD=1.96) point decrease in oxygen saturation from baseline versus a 0.90 (SD=1.22) point decrease with ketamine (t=1.92, df=78, p=0.0584). Ketamine was associated with a decrease in respiratory rate of Mean=4.98 (SD=4.08) breaths per minute compared with 3.25 (SD=3.48) for midazolam (t=2.04, df=78, p=0.0452).

**TABLE S5. Systematic Assessment for Treatment Emergent Events–General Inquiry (SAFTEE) Ratings in a Study of Ketamine vs. Midazolam in Patients With Major Depression and Clinically Significant Suicidal Ideation<sup>a</sup>**

|                                       | Ketamine (N=40) N (%) |                        |         | Midazolam (N=40) N (%) |                        |         |
|---------------------------------------|-----------------------|------------------------|---------|------------------------|------------------------|---------|
|                                       | Baseline              | Immediate postinfusion | Day 1   | Baseline               | Immediate postinfusion | Day 1   |
| <b>SEVERITY OF EVENTS<sup>b</sup></b> |                       |                        |         |                        |                        |         |
| Patients with any severe event        | 2 (5)                 | 3 (8)                  | 0       | 1 (3)                  | 1 (3)                  | 0       |
| Patients with any moderate event      | 3 (8)                 | 6 (15)                 | 3 (8)   | 8 (20)                 | 6 (15)                 | 3 (8)   |
| Patients with any mild event          | 6 (15)                | 14 (35)                | 8 (20)  | 7 (18)                 | 25 (63)                | 10 (25) |
| Patients with any event               | 11 (28)               | 21 (53)                | 10 (25) | 15 (38)                | 32 (80)                | 12 (30) |
| <b>TYPE OF EVENT</b>                  |                       |                        |         |                        |                        |         |
| Numbness                              |                       | 6 (15)                 |         |                        | 1 (3)                  |         |
| Perceptual problems                   |                       | 5 (13)                 | 2 (5)   | 1 (3)                  |                        | 1 (3)   |
| Dizziness/faintness                   |                       | 5 (13)                 | 1 (3)   |                        |                        |         |
| Drowsiness                            |                       | 5 (13)                 |         |                        | 16 (40)                |         |
| Headache                              | 3 (8)                 | 2 (5)                  | 1 (3)   | 8 (20)                 | 5 (13)                 | 3 (8)   |
| Dry Mouth                             |                       | 2 (5)                  | 1 (3)   |                        |                        |         |
| Nausea                                |                       | 2 (5)                  |         |                        | 1 (3)                  |         |
| Cold sensation                        |                       | 1 (3)                  |         |                        | 4 (10)                 |         |
| Vomiting                              |                       | 1 (3)                  |         |                        |                        |         |
| Rapid heartbeat                       |                       | 1 (3)                  |         |                        |                        |         |
| Difficulty swallowing                 |                       | 1 (3)                  |         |                        |                        |         |
| Musculoskeletal pain                  | 4 (10)                |                        | 3 (8)   | 2 (5)                  |                        | 2 (5)   |
| Fatigue                               | 3 (8)                 |                        | 2 (5)   | 2 (5)                  | 11 (28)                | 2 (5)   |
| Constipation                          | 3 (8)                 |                        | 1 (3)   |                        |                        |         |
| Anxiety                               |                       |                        | 1 (3)   |                        |                        |         |
| Memory problems                       |                       |                        | 1 (3)   |                        |                        |         |
| Loss of consciousness                 |                       |                        |         |                        | 1 (3)                  |         |
| Diarrhea                              | 1 (3)                 |                        |         | 1 (3)                  |                        | 2 (5)   |
| Stomach/abdominal discomfort          |                       |                        |         | 2 (5)                  |                        | 1 (3)   |
| Irritability                          |                       |                        |         |                        |                        | 1 (3)   |
| Interrupted sleep                     |                       |                        |         |                        |                        | 1 (3)   |
| Tinnitus                              | 1 (3)                 |                        |         |                        |                        |         |
| Concentration difficulty              | 1 (3)                 |                        |         |                        |                        |         |
| Sore throat                           | 1 (3)                 |                        |         |                        |                        |         |
| Skin irritation                       |                       |                        |         | 1 (3)                  |                        |         |
| Appetite increase                     |                       |                        |         | 1 (3)                  |                        |         |
| Edema                                 |                       |                        |         | 1 (3)                  |                        |         |

<sup>a</sup> Comparisons between treatment groups: frequency of all events immediately postinfusion (U=615.50, p=0.0508) and on Day 1 (U=768.00, p=0.6932); severity of events immediately postinfusion (U=645.00, p=0.1162) and on Day 1 (U=771.00, p=0.7216).

<sup>b</sup> Patients who experienced multiple events with varying severity are counted in more than one severity category.

**TABLE S6. Serious Adverse Events Requiring Institutional Review Board Report**

| Randomized Group | Responder <sup>a</sup> | Remitter <sup>b</sup> | Open Infusion | Open infusion response | Timepoint of event      | Brief Description                                                       |
|------------------|------------------------|-----------------------|---------------|------------------------|-------------------------|-------------------------------------------------------------------------|
| Midazolam        | No                     | No                    | Yes           | Remitter               | Month 4                 | Zolpidem misuse without suicidal intent                                 |
| Ketamine         | Yes                    | No                    | No            |                        | Week 7 and Month 6      | Medical illness unrelated to study                                      |
| Midazolam        | Yes                    | Yes                   | No            |                        | Month 6                 | Inpatient admission for increased suicidal ideation                     |
| Ketamine         | Yes                    | No                    | No            |                        | Week 6                  | Inpatient admission for increased suicidal ideation                     |
| Ketamine         | No                     | No                    | No            |                        | Month 5                 | Overdose resulting in inpatient admission                               |
| Midazolam        | Yes                    | No                    | Yes           | Remitter               | Before study procedures | Overdose, discussed with therapist, did not lead to inpatient admission |
| Ketamine         | Yes                    | No                    | No            |                        | Month 7                 | Overdose resulting in inpatient admission                               |
| Midazolam        | No                     | No                    | Yes           | Nonresponder           | Month 4                 | Inpatient admission for increased suicidal ideation                     |
| Ketamine         | Yes                    | Yes                   | No            |                        | Week 2                  | Overdose                                                                |

<sup>a</sup> Response=Day 1 Scale for Suicidal Ideation score $\geq$ 50% lower than baseline.

<sup>b</sup> Remission=Day 1 Scale for Suicidal Ideation score $\geq$ 50% lower than baseline and $<$ 4.
